# Supplementary material
Source: publisher figshare collection journal article supplement (https://rs.figshare.com/ndownloader/files/20939754)
Supplement: Supplementary file [file 20939754]

**Supplementary Material 3:** Feeling thermometers investigating how safe, attractive and tidy respondents believe public open greenspace with and without SuDS to be.

100 — Extremely **safe**

*How **safe** do you feel these public open spaces are?*

*Draw an X on the scale to indicate how you feel.*

0 — Extremely **unsafe**

100 — Extremely **attractive**

*How **attractive** do you feel these public open spaces are?*

*Draw an X on the scale to indicate how you feel.*

0 — Extremely **unattractive**

100 — Extremely **tidy**

*How **tidy** do you feel these public open spaces are?*

*Draw an X on the scale to indicate how you feel.*

0 — Extremely **untidy**
